# Supplementary material for: Correlation between the feed composition and membrane wetting in a direct contact membrane distillation process
Source: Royal Society of Chemistry journal article supplement (doi:10.1039/d0ew01125h), 2021-01-01
Supplement: d0ew01125h1.pdf [file d0ew01125h1.pdf]

## Supplementary Information

1

2

### 3 **Correlation between the feed composition and membrane wetting in a direct** 4 **contact membrane distillation process**

5

6 Joowan Lim,<sup>a</sup> Kwang Pyo Son,<sup>a</sup> Seung Mo Kang,<sup>a</sup> Jeongwon Park,<sup>a</sup> Sojin Min,<sup>a</sup> Hyeongrak  
7 Cho,<sup>b</sup> Seung-Hyun Kim,<sup>c</sup> Sangho Lee,<sup>b</sup> Soryong Chae<sup>d</sup> and Pyung-Kyu Park<sup>a,\*</sup>

8

9 <sup>a</sup> Department of Environmental Engineering, Yonsei University, 1 Yonseidae-gil, Wonju,  
10 Gangwon-do 26493, Republic of Korea.

11 <sup>b</sup> School of Civil and Environmental Engineering, Kookmin University, 77 Jeongneung-ro,  
12 Seoul 02707, Republic of Korea

13 <sup>c</sup> Civil Engineering Department, Kyungnam University, 7 Gyeongnamdaehak-ro, Changwon,  
14 Gyeongsangnam-do 51767, Republic of Korea

15 <sup>d</sup> Department of Chemical and Environmental Engineering, University of Cincinnati, 2901  
16 Woodside Drive, Cincinnati, OH 45221, USA

17

18

19

20 \*Corresponding author: Pyung-Kyu Park

21 Tel.: +82-33-760-2890; E-mail: [pkpark@yonsei.ac.kr](mailto:pkpark@yonsei.ac.kr)

22

23 **Table S1. Operation time until distillate conductivity reached 50  $\mu$ S/cm**

| <b>Feed solutions</b>                        | <b>Additional compounds to the background solution</b>  | <b>Time [d]</b> |
|----------------------------------------------|---------------------------------------------------------|-----------------|
| <b>Background solution*</b>                  | -                                                       | 1.60            |
|                                              | -                                                       | 1.52            |
| <b>Inorganics in the background solution</b> | CaCl <sub>2</sub> 1000 ppm + MgSO <sub>4</sub> 1000 ppm | 1.14            |
|                                              | CaCl <sub>2</sub> 2000 ppm + MgSO <sub>4</sub> 2000 ppm | 0.96            |
|                                              | CaCl <sub>2</sub> 4000 ppm + MgSO <sub>4</sub> 4000 ppm | 0.75            |
| <b>Organics in the background solution</b>   | HA 50 mg C/L                                            | -**             |
|                                              | HA 100 mg C/L                                           | -**             |
|                                              | O-HA (1 h) 50 mg C/L                                    | 0.94            |
|                                              | O-HA (1 h) 100 mg C/L                                   | 0.47            |
|                                              | O-HA (2 h) 50 mg C/L                                    | 0.66            |
|                                              | O-HA (2 h) 100 mg C/L                                   | 0.47            |
|                                              | O-HA (3 h) 50 mg C/L                                    | 0.29            |
|                                              | O-HA (3 h) 100 mg C/L                                   | 0.27            |

24 \* The background solution consisted of 50,000 ppm NaCl, 200 ppm NaHCO<sub>3</sub>, and 10 ppm SDS.

25 \*\* Distillate conductivity did not reach 50  $\mu$ S/cm until operation was ceased in 2 days.

26 **Table S2. Turbidity of the feed solutions containing CaCl<sub>2</sub> and MgSO<sub>4</sub>**

|                       | <b>Additional compounds to the background solution*</b> | <b>Turbidity [NTU]</b> |
|-----------------------|---------------------------------------------------------|------------------------|
|                       | CaCl <sub>2</sub> 1000 ppm + MgSO <sub>4</sub> 1000 ppm | 15.1                   |
| <b>Feed solutions</b> | CaCl <sub>2</sub> 2000 ppm + MgSO <sub>4</sub> 2000 ppm | 44.7                   |
|                       | CaCl <sub>2</sub> 4000 ppm + MgSO <sub>4</sub> 4000 ppm | 71.6                   |

27 \* The background solution consisted of 50,000 ppm NaCl, 200 ppm NaHCO<sub>3</sub>, and 10 ppm SDS.

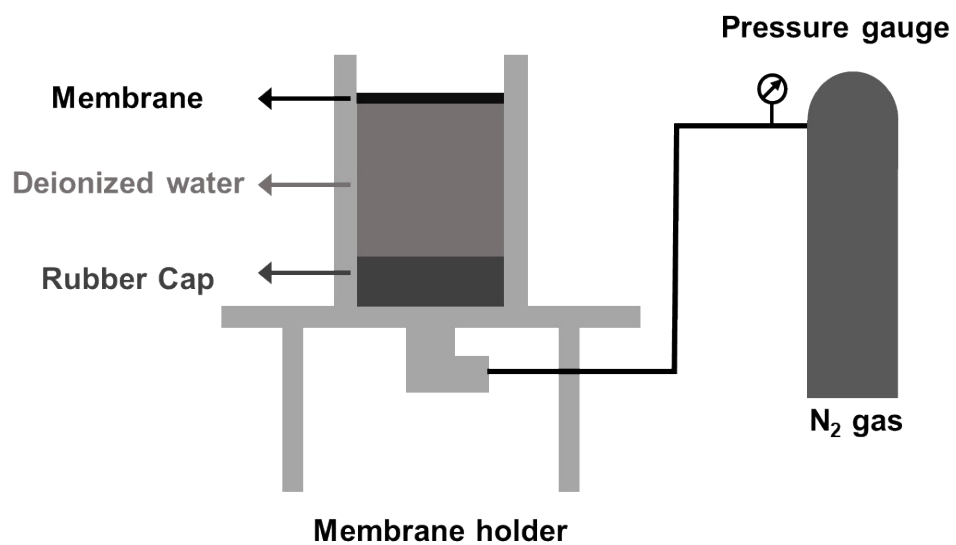

28

29 **Figure S1. Schematic diagram of the device used for the LEP measurements.**

30

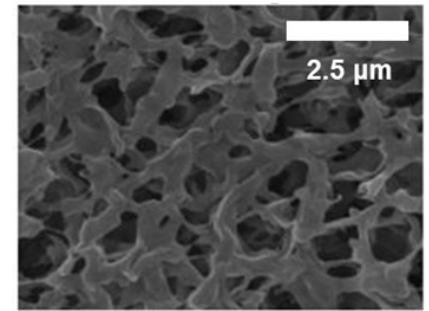

31

| Element      | K ratio | wt%           |
|--------------|---------|---------------|
| C            | 0.39944 | 71.07         |
| F            | 0.11773 | 28.93         |
| <b>Total</b> |         | <b>100.00</b> |

32

33

34

35

(a)

36

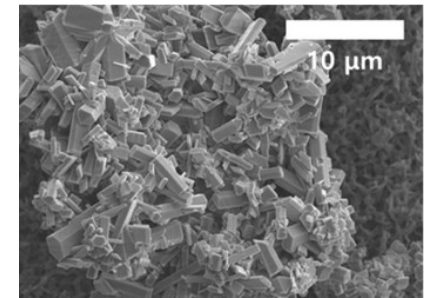

37

| Element      | K ratio | wt%           |
|--------------|---------|---------------|
| O            | 0.00301 | 32.65         |
| Na           | 0.00018 | 0.58          |
| Mg           | 0.00001 | 0.03          |
| S            | 0.00012 | 0.21          |
| Cl           | 0.00115 | 1.98          |
| Ca           | 0.03895 | 64.56         |
| <b>Total</b> |         | <b>100.01</b> |

38

39

40

41

42

43

44

(b)

45 **Figure S2. SEM-EDX data of (a) a virgin membrane and (b) the distillate-side wetted**  
46 **surface of the membrane sampled after operation with the feed solution containing both**  
47 **2000 ppm CaCl<sub>2</sub> and 2000 ppm MgSO<sub>4</sub>.**

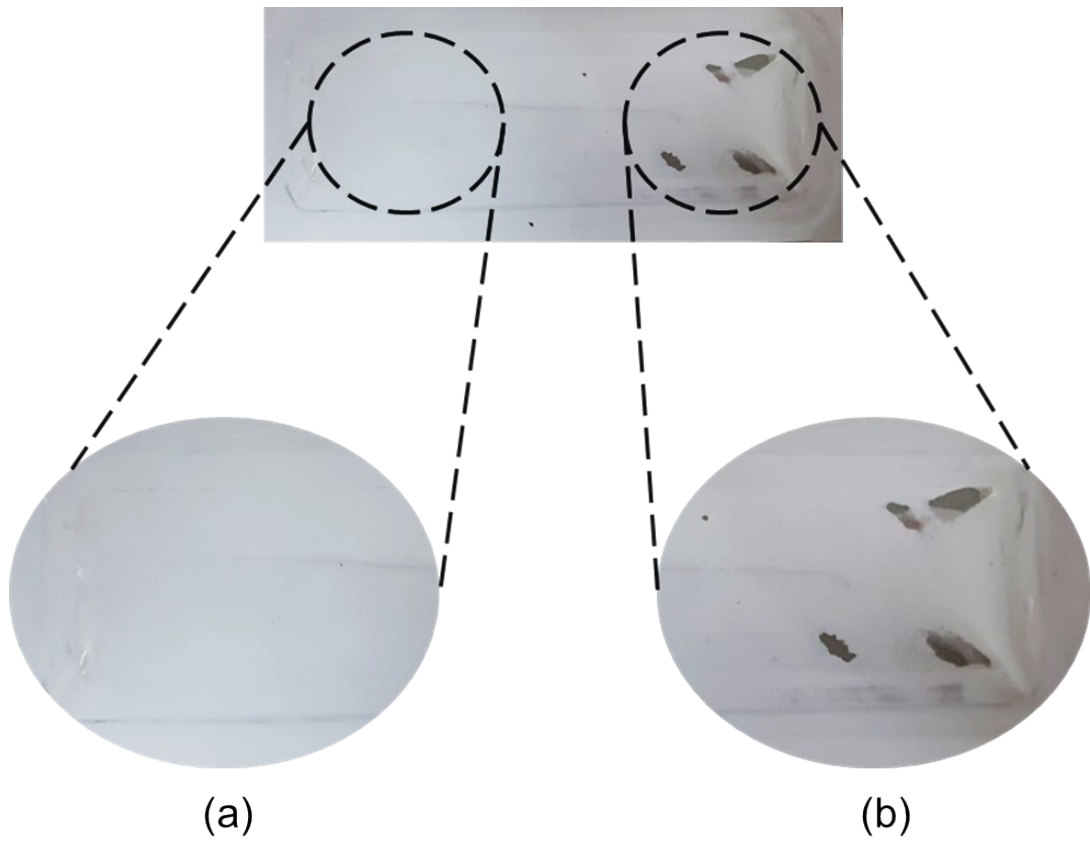

49

50 **Figure S3. Images of the distillate side of the membrane taken after the occurrence of**  
51 **membrane wetting during the MD operation with the feed solution containing both 1000**  
52 **ppm  $\text{CaCl}_2$  and 1000 ppm  $\text{MgSO}_4$  in the background solution: (a) non-wetted surface and**  
53 **(b) wetted surface.**

54

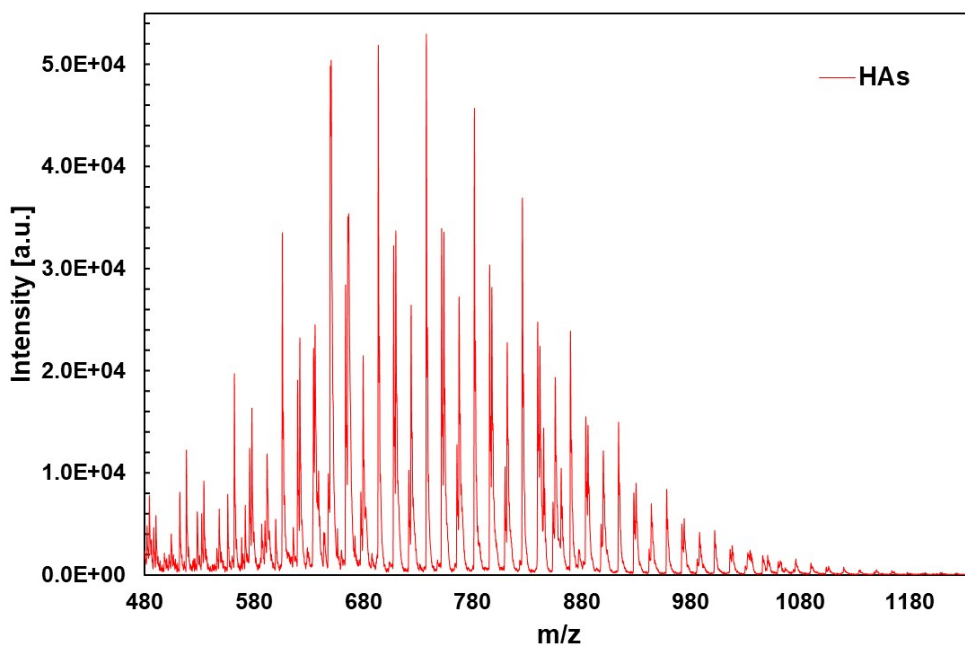

55

56

(a)

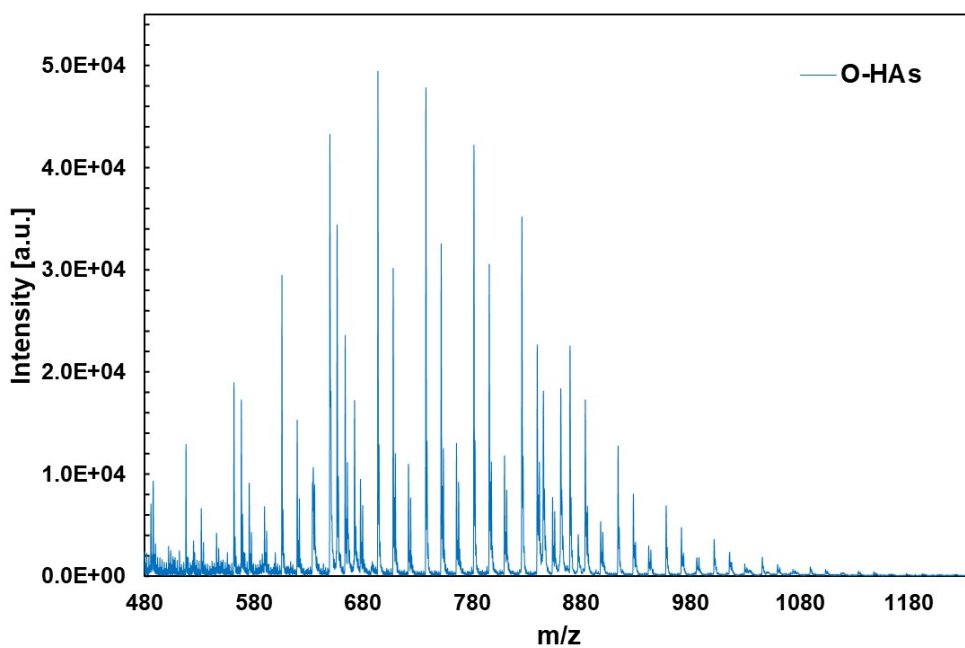

57

58

(b)

59 **Figure S4. MALDI-TOF data of (a) HAs and (b) O-HAs ozonated for 2 h.**

60

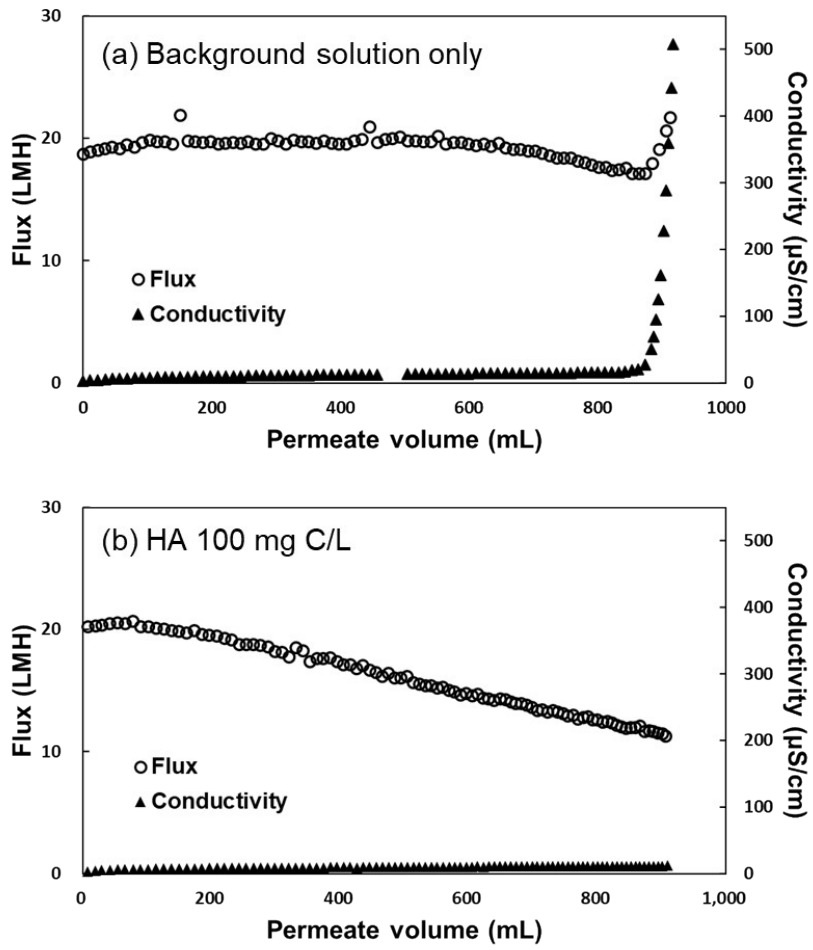

61

62 **Figure S5. Distillate flux and conductivity during the MD operation with (a) background**  
 63 **solution and (b) the feed solution containing 100 mg C/L of HAs.**

64

65



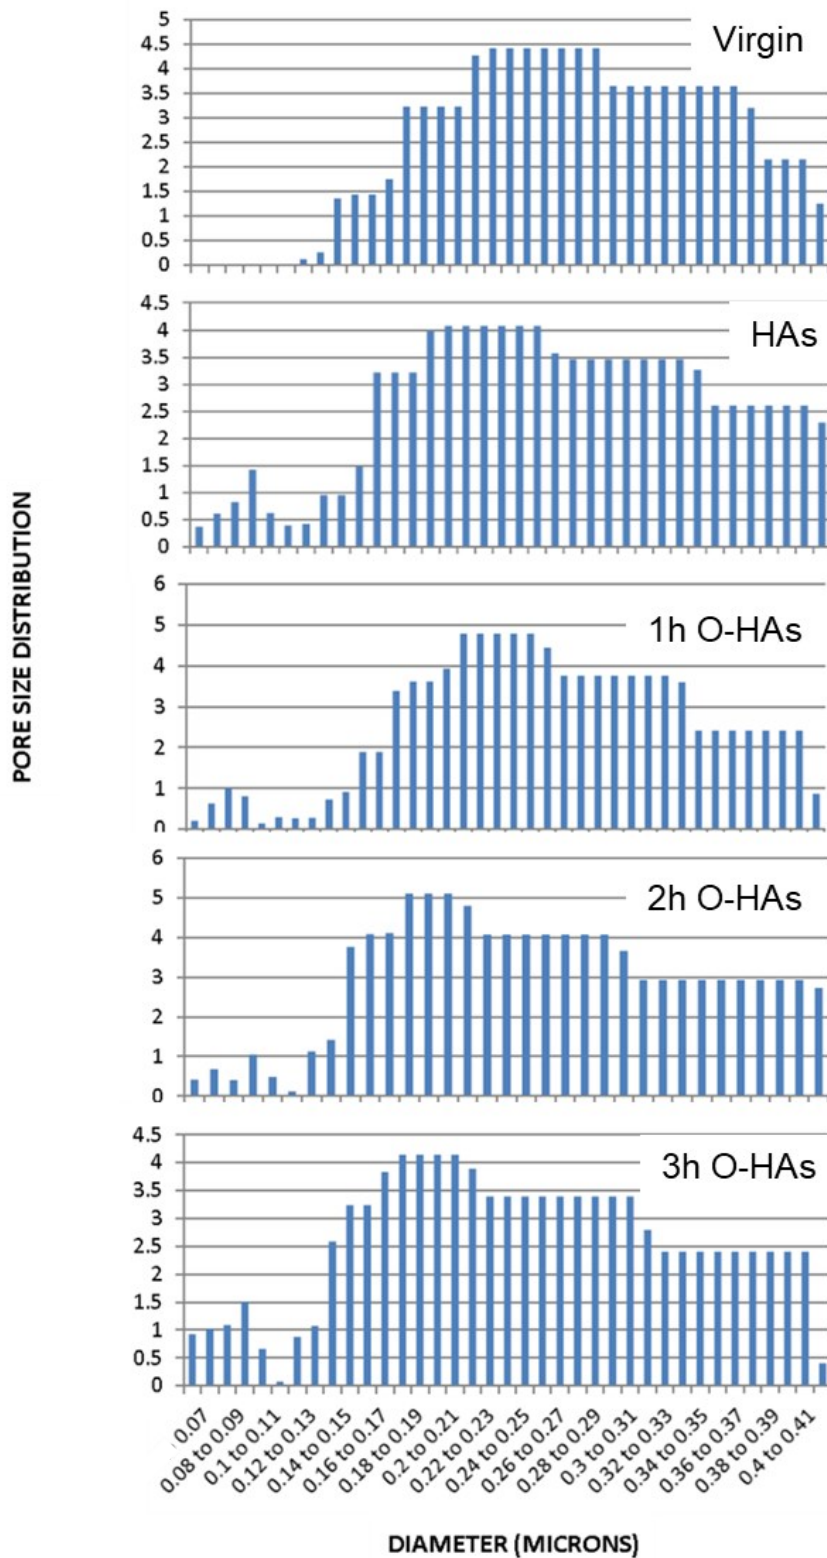

66

67 **Figure S6. Pore size distribution of virgin membrane and the membranes sampled after**

68 **the MD operation with the feed solutions containing 100 mg C/L of HAs or O-HAs.**
